# Supplementary material for: Early warning and drought risk assessment for the Bolivian Altiplano agriculture using high resolution satellite imagery data
Source: Copernicus journal article supplement (doi:10.5194/nhess-2018-133), 2018-05-17

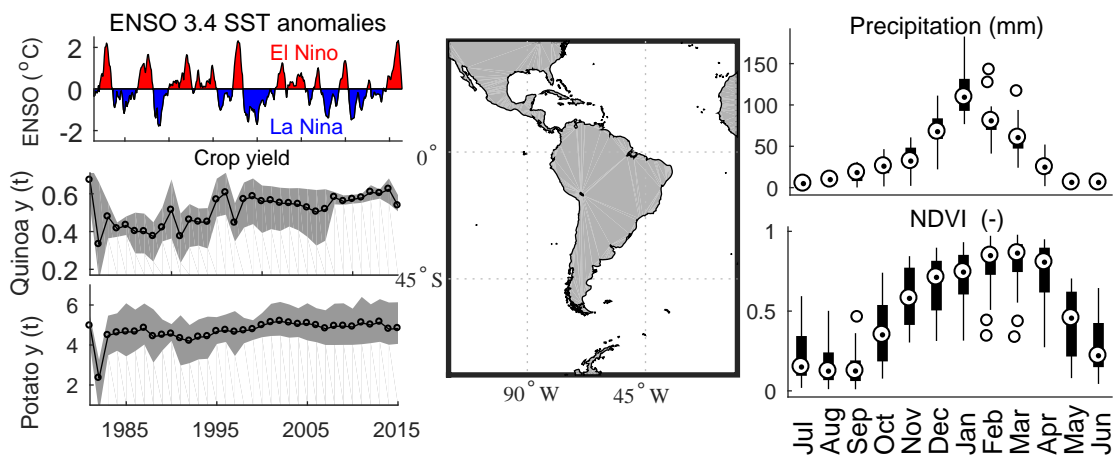

Supplement: Supplementary file [file nhess-2018-133-supplement.pdf]
